# Supplementary material for: The Mechanism of Gene Targeting in Human Somatic Cells
Source: PubMed Central journal article supplement (PMC3974634; doi:10.1371/journal.pgen.1004251), 2014-04-03

S5. Subcloning of colonies from Supplemental Table S4 that are sectored on both arms.

| Clone | Subclone | Legends: |       |     |      |      |      |      |     |      |      | Viral | Genomic | Unsectored   |
|-------|----------|----------|-------|-----|------|------|------|------|-----|------|------|-------|---------|--------------|
|       |          | NdeI     | EcoRI | LHP | NcoI | AseI | SspI | SacI | RHP | XbaI | SbfI | Trans | Cis     | Noncanonical |
| #1    | 1        | -        | -     | -   | -    | +    | +    | +    | +   | +    | -    | 1     |         |              |
|       | 2        | +        | +     | +   | +    | +    | +    | +    | -   | -    | -    | 1     |         |              |
|       | 3        | +        | +     | +   | +    | +    | +    | +    | -   | -    | -    | 1     |         |              |
|       | 4        | -        | -     | -   | -    | +    | +    | +    | +   | +    | -    | 1     |         |              |
|       | 5        | +        | +     | +   | +    | +    | +    | +    | -   | -    | -    | 1     |         |              |
|       | 6        | +        | +     | +   | +    | +    | +    | +    | -   | -    | -    | 1     |         |              |
|       | 7        | +        | +     | +   | +    | +    | +    | +    | -   | -    | -    | 1     |         |              |
|       | 8        | -        | -     | -   | -    | -    | +    | +    | +   | +    | -    | 1     |         |              |
| #2    | 1        | +        | +     | +   | +    | +    | +    | +    | -   | -    | -    | 1     |         |              |
|       | 2        | -        | -     | -   | +    | +    | +    | +    | +   | +    | -    | 1     |         |              |
|       | 3        | -        | -     | -   | +    | +    | +    | +    | +   | +    | -    | 1     |         |              |
|       | 4        | -        | -     | -   | +    | +    | +    | +    | +   | +    | -    | 1     |         |              |
|       | 5        | -        | -     | -   | +    | +    | +    | +    | +   | +    | -    | 1     |         |              |
|       | 6        | +        | +     | +   | +    | +    | +    | +    | -   | -    | -    | 1     |         |              |
|       | 7        | +        | +     | +   | +    | +    | +    | +    | -   | -    | -    | 1     |         |              |
|       | 8        | +        | +     | +   | +    | +    | +    | +    | -   | -    | -    | 1     |         |              |
| #3    | 1        | -        | -     | +   | -    | +    | +    | +    | +   | +    | +    | 1     |         |              |
|       | 2        | +        | +     | +   | +    | +    | +    | -    | -   | -    | -    | 1     |         |              |
|       | 3        | -        | -     | +   | -    | +    | +    | +    | +   | +    | +    | 1     |         |              |
|       | 4        | -        | -     | +   | -    | +    | +    | +    | +   | +    | +    | 1     |         |              |
| #4    | 1        | -        | -     | -   | -    | +    | +    | +    | +   | +    | -    | 1     |         |              |
|       | 2        | -        | +     | +   | +    | +    | +    | +    | +   | -    | -    | 1     |         |              |
|       | 3        | -        | +     | +   | +    | +    | +    | +    | +   | -    | -    | 1     |         |              |
|       | 4        | -        | -     | -   | -    | +    | +    | +    | +   | +    | -    | 1     |         |              |
|       | 5        | -        | -     | -   | -    | +    | +    | +    | +   | +    | -    | 1     |         |              |
|       | 6        | -        | -     | -   | -    | +    | +    | +    | +   | +    | -    | 1     |         |              |
|       | 7        | -        | -     | -   | -    | +    | +    | +    | +   | +    | -    | 1     |         |              |
| #5    | 1        | -        | -     | -   | -    | +    | +    | +    | +   | +    | -    | 1     |         |              |
|       | 2        | -        | +     | +   | +    | +    | +    | +    | -   | -    | -    | 1     |         |              |
|       | 3        | -        | -     | -   | -    | +    | +    | +    | +   | +    | -    | 1     |         |              |
|       | 4        | -        | +     | +   | +    | +    | +    | +    | +   | +    | -    | 1     |         | 1            |
|       | 5        | -        | -     | -   | -    | +    | +    | +    | +   | +    | -    | 1     |         |              |
|       | 6        | -        | +     | +   | +    | +    | +    | +    | +   | -    | -    | 1     |         |              |
|       | 7        | -        | -     | -   | -    | +    | +    | +    | +   | +    | -    | 1     |         |              |
|       | 8        | -        | +     | +   | +    | +    | +    | +    | +   | -    | -    | 1     |         |              |
| #6    | 1        | -        | +     | +   | +    | +    | +    | +    | -   | -    | -    | 1     |         |              |
|       | 2        | -        | -     | -   | -    | +    | +    | +    | -   | -    | -    | 1     | 1       |              |
|       | 3        | -        | -     | -   | -    | +    | +    | +    | +   | +    | -    | 1     |         |              |
|       | 4        | -        | +     | +   | +    | +    | +    | +    | -   | -    | -    | 1     |         |              |
|       | 5        | -        | +     | +   | +    | +    | +    | +    | +   | +    | -    | 1     | 1       |              |
|       | 6        | -        | +     | +   | +    | +    | +    | +    | -   | -    | -    | 1     |         |              |
|       | 7        | -        | +     | +   | +    | +    | +    | +    | -   | -    | -    | 1     |         |              |
|       | 8        | -        | -     | -   | -    | +    | +    | +    | +   | +    | -    | 1     |         |              |
| #7    | 1        | -        | -     | -   | -    | +    | +    | -    | -   | -    | -    | 1     | 1       |              |
|       | 2        | -        | -     | -   | -    | +    | +    | +    | +   | +    | -    | 1     |         |              |
|       | 3        | -        | +     | +   | +    | +    | +    | -    | -   | -    | -    | 1     |         |              |
|       | 4        | -        | +     | +   | +    | +    | +    | -    | -   | -    | -    | 1     |         |              |
|       | 5        | -        | +     | +   | +    | +    | +    | -    | -   | -    | -    | 1     |         |              |
|       | 6        | -        | +     | +   | +    | +    | +    | +    | -   | -    | -    | 1     | 1       |              |
| #8    | 1        | -        | +     | +   | +    | +    | +    | -    | -   | -    | -    | 1     |         |              |
|       | 2        | -        | -     | -   | -    | +    | +    | +    | -   | -    | -    | 1     |         |              |
|       | 3        | -        | +     | +   | +    | +    | +    | -    | -   | -    | -    | 1     |         |              |
|       | 4        | -        | +     | +   | +    | +    | +    | -    | -   | -    | -    | 1     |         |              |
|       | 5        | -        | +     | +   | +    | +    | +    | -    | -   | -    | -    | 1     |         |              |
|       | 6        | -        | -     | -   | -    | +    | +    | +    | -   | -    | -    | 1     |         |              |
|       | 7        | -        | +     | +   | +    | +    | +    | -    | -   | -    | -    | 1     |         |              |
|       | 8        | -        | -     | -   | -    | +    | +    | +    | -   | -    | -    | 1     |         |              |
| #9    | 1        | -        | +     | +   | +    | +    | -    | -    | -   | -    | -    | 1     |         |              |
|       | 2        | -        | +     | +   | +    | +    | -    | -    | -   | -    | -    | 1     |         |              |
|       | 3        | -        | -     | -   | -    | +    | +    | +    | +   | +    | -    | 1     |         |              |
|       | 4        | -        | +     | +   | +    | +    | +    | +    | +   | +    | -    | 1     |         | 1            |
| #10   | 1        | -        | -     | -   | -    | +    | +    | +    | +   | +    | -    | 1     |         |              |
|       | 2        | -        | -     | -   | +    | +    | +    | -    | -   | -    | -    | 1     |         |              |
|       | 3        | -        | -     | -   | +    | +    | +    | -    | -   | -    | -    | 1     |         |              |
|       | 4        | -        | -     | -   | -    | +    | +    | +    | +   | +    | -    | 1     |         |              |
|       | 5        | -        | -     | -   | -    | +    | +    | +    | +   | +    | -    | 1     |         |              |
|       | 6        | -        | -     | -   | -    | +    | +    | +    | +   | +    | -    | 1     |         |              |
|       | 7        | -        | -     | -   | -    | +    | +    | +    | +   | +    | -    | 1     |         |              |
|       | 8        | -        | -     | -   | -    | +    | +    | +    | +   | +    | -    | 1     |         |              |
| #11   | 1        | -        | +     | +   | +    | +    | +    | -    | -   | -    | -    | 1     |         |              |
|       | 2        | -        | +     | +   | +    | +    | +    | -    | -   | -    | -    | 1     |         |              |
|       | 3        | -        | +     | +   | +    | +    | +    | -    | -   | -    | -    | 1     |         |              |
|       | 4        | -        | -     | -   | -    | -    | +    | +    | +   | +    | -    | 1     |         |              |
|       | 5        | -        | -     | -   | -    | -    | +    | +    | +   | +    | -    | 1     |         |              |
|       | 6        | -        | -     | -   | -    | -    | +    | -    | -   | -    | -    | 1     | 1       |              |
|       | 7        | -        | -     | -   | -    | -    | +    | -    | -   | -    | -    | 1     | 1       |              |
|       | 8        | -        | +     | +   | +    | +    | +    | -    | -   | -    | -    | 1     |         |              |

Note: Colonies generated by two independent GTing events have an equal chance to become *trans* or *cis* 89.61%    7.79%    2.82%

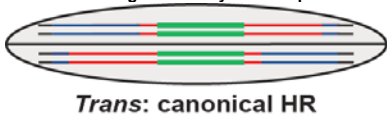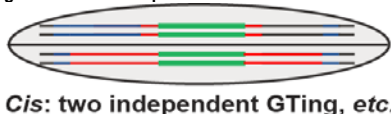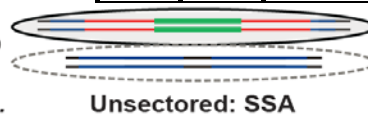

Supplement: pgen.1004251.s009.pdf [file pgen.1004251.s009.pdf]
