# Supplementary material for: The Mechanism of Gene Targeting in Human Somatic Cells
Source: PubMed Central journal article supplement (PMC3974634; doi:10.1371/journal.pgen.1004251), 2014-04-03
Supplement: pgen.1004251.s005.pdf [file pgen.1004251.s005.pdf]

S1. SNP retention of rAAV gene targeting colonies in parental HCT116 cells.

|              |               |               |               |               |               |               |               |               |              | Legends:   |                |
|--------------|---------------|---------------|---------------|---------------|---------------|---------------|---------------|---------------|--------------|------------|----------------|
|              |               |               |               |               |               |               |               |               |              | Viral      | Genomic        |
| NdeI         | EcoRI         | LHP           | NcoI          | AseI          | SspI          | SacI          | RHP           | XbaI          | SbfI         | #          | %              |
| +            | +             | +             | +             | +             | +             | +             | -             | -             | -            | 5          | 2.2%           |
| +            | +             | +             | +             | +             | +             | -             | -             | -             | -            | 1          | 0.4%           |
| +            | +             | +             | +             | +             | -             | +             | -             | -             | +            | 1          | 0.4%           |
| -            | +             | +             | +             | +             | +             | +             | +             | +             | -            | 2          | 0.9%           |
| -            | +             | +             | +             | +             | +             | +             | +             | -             | -            | 14         | 6.1%           |
| -            | +             | +             | +             | +             | +             | +             | -             | +             | -            | 1          | 0.4%           |
| -            | +             | +             | +             | +             | +             | +             | -             | -             | -            | 9          | 3.9%           |
| -            | +             | +             | +             | +             | +             | -             | -             | -             | +            | 2          | 0.9%           |
| -            | +             | +             | +             | +             | +             | -             | -             | -             | -            | 17         | 7.4%           |
| -            | +             | +             | +             | +             | -             | +             | -             | -             | -            | 1          | 0.4%           |
| -            | +             | +             | +             | +             | -             | -             | -             | -             | -            | 7          | 3.0%           |
| -            | +             | -             | +             | +             | +             | -             | -             | -             | -            | 2          | 0.9%           |
| -            | +             | -             | +             | +             | +             | +             | -             | -             | -            | 2          | 0.9%           |
| -            | +             | -             | +             | +             | -             | -             | -             | -             | -            | 1          | 0.4%           |
| -            | +             | -             | -             | -             | +             | +             | +             | +             | -            | 1          | 0.4%           |
| -            | -             | +             | +             | +             | +             | +             | +             | +             | -            | 3          | 1.3%           |
| -            | -             | +             | +             | +             | +             | +             | +             | -             | -            | 3          | 1.3%           |
| -            | -             | +             | +             | +             | +             | +             | -             | -             | -            | 6          | 2.6%           |
| -            | -             | +             | +             | +             | +             | -             | +             | -             | -            | 2          | 0.9%           |
| -            | -             | +             | +             | +             | +             | -             | -             | -             | -            | 13         | 5.7%           |
| -            | -             | +             | +             | +             | -             | -             | -             | -             | -            | 4          | 1.7%           |
| -            | -             | +             | -             | +             | +             | +             | +             | +             | -            | 11         | 4.8%           |
| -            | -             | +             | -             | +             | +             | +             | +             | -             | -            | 5          | 2.2%           |
| -            | -             | +             | -             | +             | +             | -             | +             | +             | -            | 2          | 0.9%           |
| -            | -             | +             | -             | +             | +             | -             | -             | -             | -            | 1          | 0.4%           |
| -            | -             | +             | -             | +             | -             | +             | +             | -             | -            | 1          | 0.4%           |
| -            | -             | +             | -             | +             | -             | -             | +             | -             | -            | 1          | 0.4%           |
| -            | -             | +             | -             | -             | -             | +             | +             | +             | -            | 1          | 0.4%           |
| -            | -             | -             | +             | +             | +             | +             | +             | +             | +            | 2          | 0.9%           |
| -            | -             | -             | +             | +             | +             | +             | +             | +             | -            | 3          | 1.3%           |
| -            | -             | -             | +             | +             | +             | +             | +             | -             | -            | 1          | 0.4%           |
| -            | -             | -             | +             | +             | +             | +             | -             | -             | -            | 3          | 1.3%           |
| -            | -             | -             | +             | +             | +             | -             | +             | -             | -            | 1          | 0.4%           |
| -            | -             | -             | +             | +             | +             | -             | -             | -             | -            | 1          | 0.4%           |
| -            | -             | -             | -             | +             | +             | +             | +             | +             | +            | 5          | 2.2%           |
| -            | -             | -             | -             | +             | +             | +             | +             | +             | -            | 35         | 15.2%          |
| -            | -             | -             | -             | +             | +             | +             | +             | -             | -            | 16         | 7.0%           |
| -            | -             | -             | -             | +             | +             | +             | -             | +             | +            | 3          | 1.3%           |
| -            | -             | -             | -             | +             | +             | +             | -             | +             | -            | 2          | 0.9%           |
| -            | -             | -             | -             | +             | +             | +             | -             | -             | -            | 6          | 2.6%           |
| -            | -             | -             | -             | +             | +             | -             | +             | -             | -            | 2          | 0.9%           |
| -            | -             | -             | -             | +             | +             | -             | -             | -             | -            | 19         | 8.3%           |
| -            | -             | -             | -             | +             | -             | +             | +             | +             | -            | 2          | 0.9%           |
| -            | -             | -             | -             | +             | -             | -             | -             | -             | -            | 2          | 0.9%           |
| -            | -             | -             | -             | -             | +             | +             | +             | +             | -            | 3          | 1.3%           |
| -            | -             | -             | -             | -             | +             | +             | -             | -             | -            | 1          | 0.4%           |
| -            | -             | -             | -             | -             | +             | -             | -             | -             | -            | 4          | 1.7%           |
| <b>7</b>     | <b>66</b>     | <b>115</b>    | <b>105</b>    | <b>220</b>    | <b>209</b>    | <b>148</b>    | <b>116</b>    | <b>76</b>     | <b>13</b>    | <b>230</b> | <b>100.00%</b> |
| <b>3.04%</b> | <b>28.70%</b> | <b>50.00%</b> | <b>45.65%</b> | <b>95.65%</b> | <b>90.87%</b> | <b>64.35%</b> | <b>50.43%</b> | <b>33.04%</b> | <b>5.65%</b> |            |                |
