# Supplementary material for: The Mechanism of Gene Targeting in Human Somatic Cells
Source: PubMed Central journal article supplement (PMC3974634; doi:10.1371/journal.pgen.1004251), 2014-04-03
Supplement: pgen.1004251.s007.pdf [file pgen.1004251.s007.pdf]

S3. SNP retention of plasmid-based gene targeting in parental HCT116 cells.

|              |               |               |               |               |               |               |               | Legends:      |               |
|--------------|---------------|---------------|---------------|---------------|---------------|---------------|---------------|---------------|---------------|
| NdeI         | EcoRI         | LHP           | NcoI          | AseI          | SspI          | SacI          | RHP           | Viral         | Genomic       |
|              |               |               |               |               |               |               |               | XbaI          | SbfI          |
| +            | +             | +             | +             | +             | +             | -             | -             | -             | -             |
| -            | +             | +             | +             | +             | +             | +             | -             | +             | -             |
| -            | +             | +             | +             | +             | +             | +             | -             | +             | -             |
| -            | +             | +             | +             | +             | +             | -             | -             | -             | -             |
| -            | +             | -             | -             | +             | +             | +             | -             | -             | -             |
| -            | -             | +             | +             | +             | +             | +             | +             | +             | +             |
| -            | -             | +             | +             | +             | +             | +             | +             | +             | -             |
| -            | -             | +             | +             | +             | +             | +             | -             | -             | -             |
| -            | -             | +             | +             | +             | +             | -             | -             | -             | -             |
| -            | -             | +             | +             | +             | +             | +             | -             | -             | -             |
| -            | -             | -             | +             | +             | +             | +             | +             | -             | -             |
| -            | -             | -             | -             | +             | +             | +             | +             | +             | +             |
| -            | -             | -             | -             | +             | +             | +             | +             | -             | -             |
| -            | -             | -             | -             | +             | +             | +             | -             | -             | -             |
| -            | -             | -             | -             | -             | +             | +             | +             | +             | -             |
| -            | -             | -             | -             | -             | +             | +             | -             | +             | -             |
| -            | -             | -             | -             | -             | -             | -             | -             | -             | -             |
| <b>1</b>     | <b>5</b>      | <b>10</b>     | <b>11</b>     | <b>15</b>     | <b>16</b>     | <b>13</b>     | <b>6</b>      | <b>7</b>      | <b>2</b>      |
| <b>5.56%</b> | <b>27.78%</b> | <b>55.56%</b> | <b>61.11%</b> | <b>83.33%</b> | <b>88.89%</b> | <b>72.22%</b> | <b>33.33%</b> | <b>38.89%</b> | <b>11.11%</b> |
