# Supplementary material for: The Mechanism of Gene Targeting in Human Somatic Cells
Source: PubMed Central journal article supplement (PMC3974634; doi:10.1371/journal.pgen.1004251), 2014-04-03
Supplement: pgen.1004251.s010.pdf [file pgen.1004251.s010.pdf]

S6. The sectoring assay in parental DLD-1 cells.

| Legends: |        |        |        |       |       |        |        | Viral  | Sectored | Genomic  |
|----------|--------|--------|--------|-------|-------|--------|--------|--------|----------|----------|
| NdeI     | EcoRI  | LHP    | NcoI   | AseI  | SspI  | SacI   | RHP    | XbaI   | SbfI     | Sectored |
| -        | +/-    | +      | +      | +     | +     | +/-    | +      | +      | -        | 2        |
| -        | +/-    | +      | +      | +     | +     | +/-    | +      | -      | -        | 2        |
| -        | +/-    | +      | +      | +     | +     | +/-    | +/-    | +/-    | -        | 2        |
| -        | +/-    | +      | +      | +     | -     | +/-    | +/-    | +/-    | -        | 2        |
| -        | +/-    | +      | +/-    | +     | +     | +      | +      | +      | -        | 2        |
| -        | +/-    | +      | +/-    | +     | +     | +      | +/-    | -      | -        | 2        |
| -        | +/-    | +      | +/-    | +     | +     | +/-    | +      | +      | -        | 2        |
| -        | +/-    | +      | +/-    | +     | +     | +/-    | +/-    | +/-    | +/-      | 2        |
| -        | +/-    | +      | +/-    | +     | +     | +/-    | -      | +      | -        | 2        |
| -        | +/-    | +      | +/-    | +     | +     | +/-    | -      | -      | -        | 2        |
| -        | +/-    | +      | +/-    | +     | +     | -      | +      | +/-    | -        | 2        |
| -        | +/-    | +/-    | +/-    | +     | +     | +/-    | +/-    | +      | -        | 2        |
| -        | +/-    | +/-    | +/-    | +     | +     | +/-    | -      | +/-    | -        | 2        |
| -        | +/-    | +/-    | +/-    | +     | +     | +/-    | -      | -      | -        | 2        |
| -        | +/-    | +/-    | +/-    | +     | +     | +/-    | -      | -      | -        | 2        |
| -        | +/-    | -      | +      | +     | +     | +/-    | -      | +      | -        | 2        |
| -        | +/-    | -      | +/-    | +     | +     | +/-    | +      | +      | -        | 2        |
| -        | +/-    | -      | +/-    | +     | +     | +/-    | -      | -      | -        | 2        |
| -        | +/-    | -      | +/-    | +     | +/-   | +      | +      | +      | -        | 2        |
| -        | -      | +/-    | +/-    | +     | +/-   | +/-    | -      | -      | -        | 2        |
| -        | -      | -      | +/-    | +     | +     | +      | +      | +/-    | -        | 2        |
| -        | -      | -      | +/-    | +     | +     | +      | +      | +/-    | -        | 2        |
| -        | -      | -      | +/-    | +     | +     | +/-    | +      | +/-    | -        | 2        |
| -        | -      | -      | +/-    | +     | +     | +/-    | +/-    | +/-    | -        | 2        |
| -        | -      | -      | +/-    | +     | +     | +/-    | -      | -      | -        | 2        |
| +/-      | +      | -      | +      | +     | +     | +      | +      | +      | +        | 1        |
| +/-      | +/-    | +      | +      | +     | +     | +      | +      | -      | -        | 1        |
| -        | +/-    | +      | +/-    | +     | +     | -      | +      | -      | -        | 1        |
| -        | +/-    | +/-    | +/-    | +     | +     | +      | +      | -      | -        | 1        |
| -        | +/-    | +/-    | +/-    | +     | +     | -      | -      | -      | -        | 1        |
| -        | -      | +/-    | +/-    | +     | +     | -      | -      | -      | -        | 1        |
| -        | -      | -      | +/-    | -     | -     | -      | -      | -      | -        | 1        |
| +        | +      | +      | +      | +     | +     | +      | +      | +/-    | -        | 1        |
| +        | +      | +      | +      | +     | -     | +/-    | +      | +/-    | -        | 1        |
| -        | +      | +      | +      | +     | +     | +/-    | -      | -      | +/-      | 1        |
| -        | +      | +      | +      | +     | +     | +/-    | -      | -      | -        | 1        |
| -        | -      | +      | +      | +     | +     | +/-    | +/-    | -      | -        | 1        |
| -        | -      | +      | +      | +     | +     | +/-    | -      | -      | -        | 1        |
| -        | -      | -      | -      | +     | +     | +/-    | -      | -      | -        | 1        |
| -        | -      | -      | -      | +     | +     | +      | -      | -      | -        | 0        |
| -        | -      | +      | +      | +     | +     | +      | -      | -      | -        | 0        |
| -        | -      | +      | -      | +     | +     | +      | +      | -      | -        | 0        |
| -        | -      | -      | -      | +     | +     | +      | +      | +      | -        | 0        |
| -        | -      | -      | -      | -     | +     | +      | -      | -      | -        | 0        |
| 2        | 25     | 10*    | 27     | 0     | 2     | 25     | 8      | 12     | 2        | 41       |
| 4.35%    | 54.35% | 21.74% | 58.70% | 0.00% | 4.35% | 54.35% | 17.39% | 26.09% | 4.35%    | 89.13%   |

Note: The hairpins are composed of 3-4 clustered mismatches. In the LHP, the genomic sequence CcagcTAcG basepairs with TcagcCTcC in the virus, whereas in RHP, TAc basepairs with ATG. These hairpins are sectored at a significantly lower frequency compared to the flanking SNPs in DLD-1 but not HCT116 cell line. Also in DLD-1, the TAcG/CTcC mismatch cluster in the LHP is sectored in only 3 clones, compared to the singular T/C mismatch which is sectored in 10 clones\*. These results indicate that the DLD-1 cell line can resolve clustered mismatches that can form short mismatch loops via the MSH2/MSH3 pathway, whereas the HCT116 cell line is deficient in both single
