# Supplementary material for: The Mechanism of Gene Targeting in Human Somatic Cells
Source: PubMed Central journal article supplement (PMC3974634; doi:10.1371/journal.pgen.1004251), 2014-04-03
Supplement: pgen.1004251.s012.pdf [file pgen.1004251.s012.pdf]

S8. SNP retention of *I-SceI*-induced rAAV gene targeting on the left homology arm.

|        |        |        |         |         |        |        |     | Legends: |         |
|--------|--------|--------|---------|---------|--------|--------|-----|----------|---------|
| NdeI   | EcoRI  | LHP    | NcoI    | AseI    | SspI   | SacI   | RHP | Viral    | Genomic |
|        |        |        |         |         |        |        |     | XbaI     | SbfI    |
| -      | -      | +      | +       | +       | +      | +      | ND  | +        | +       |
| -      | -      | +      | +       | +       | +      | -      | ND  | -        | -       |
| -      | +      | +      | +       | +       | +      | +      | ND  | +        | -       |
| -      | -      | +      | +       | +       | +      | +      | ND  | -        | -       |
| -      | -      | -      | +       | +       | +      | +      | ND  | +        | +       |
| -      | -      | -      | +       | +       | +      | +      | ND  | +        | -       |
| -      | -      | +      | +       | +       | +      | -      | ND  | -        | -       |
| -      | -      | -      | +       | +       | +      | +      | ND  | -        | -       |
| -      | +      | +      | +       | +       | +      | +      | ND  | -        | -       |
| -      | +      | +      | +       | +       | +      | +      | ND  | -        | -       |
| -      | +      | +      | +       | +       | +      | +      | ND  | +        | -       |
| -      | +      | +      | +       | +       | +      | +      | ND  | -        | -       |
| -      | +      | +      | +       | +       | +      | +      | ND  | -        | -       |
| +      | +      | +      | +       | +       | +      | +      | ND  | -        | -       |
| -      | -      | +      | +       | +       | +      | +      | ND  | +        | +       |
| -      | -      | -      | +       | +       | +      | -      | ND  | -        | -       |
| -      | +      | +      | +       | +       | +      | -      | ND  | -        | -       |
| -      | -      | -      | +       | +       | +      | +      | ND  | +        | +       |
| -      | -      | -      | +       | +       | +      | +      | ND  | +        | -       |
| +      | +      | +      | +       | +       | +      | +      | ND  | +        | +       |
| -      | +      | +      | +       | +       | +      | +      | ND  | +        | -       |
| -      | -      | -      | +       | +       | +      | +      | ND  | +        | -       |
| -      | -      | -      | +       | +       | +      | +      | ND  | -        | -       |
| -      | -      | +      | +       | +       | +      | +      | ND  | -        | -       |
| -      | +      | +      | +       | +       | +      | -      | ND  | -        | -       |
| -      | -      | -      | +       | +       | +      | +      | ND  | +        | -       |
| -      | +      | +      | +       | +       | +      | +      | ND  | +        | -       |
| -      | +      | +      | +       | +       | +      | +      | ND  | -        | -       |
| -      | +      | +      | +       | +       | +      | -      | ND  | -        | -       |
| -      | -      | +      | +       | +       | +      | -      | ND  | -        | -       |
| -      | -      | +      | +       | +       | +      | -      | ND  | +        | -       |
| +      | +      | +      | +       | +       | +      | +      | ND  | -        | -       |
| -      | -      | +      | +       | +       | +      | +      | ND  | +        | -       |
| -      | -      | +      | +       | +       | +      | +      | ND  | -        | -       |
| -      | -      | -      | +       | +       | +      | +      | ND  | +        | -       |
| -      | -      | +      | +       | +       | +      | +      | ND  | -        | -       |
| -      | +      | +      | +       | +       | +      | +      | ND  | +        | -       |
| -      | -      | +      | +       | +       | +      | -      | ND  | -        | -       |
| -      | -      | +      | +       | +       | +      | +      | ND  | +        | -       |
| +      | -      | +      | +       | +       | +      | -      | ND  | -        | -       |
| +      | +      | +      | +       | +       | +      | +      | ND  | -        | -       |
| -      | -      | -      | +       | +       | +      | +      | ND  | +        | -       |
| -      | -      | -      | +       | +       | +      | +      | ND  | -        | -       |
| -      | -      | +      | +       | +       | +      | +      | ND  | -        | -       |
| 6      | 19     | 35     | 48      | 48      | 45     | 36     | ND  | 20       | 5       |
| 12.50% | 39.58% | 72.92% | 100.00% | 100.00% | 93.75% | 75.00% | ND  | 41.67%   | 10.42%  |
