# Supplementary material for: The Mechanism of Gene Targeting in Human Somatic Cells
Source: PubMed Central journal article supplement (PMC3974634; doi:10.1371/journal.pgen.1004251), 2014-04-03
Supplement: pgen.1004251.s013.pdf [file pgen.1004251.s013.pdf]

S9. SNP retention of rAAV gene targeting colonies in *MLH1*<sup>+</sup>HCT116 cells.

|              |               |               |               |                |               |               |               | Legends:      |              |
|--------------|---------------|---------------|---------------|----------------|---------------|---------------|---------------|---------------|--------------|
|              |               |               |               |                |               |               |               | Viral         | Genomic      |
| NdeI         | EcoRI         | LHP           | NcoI          | AseI           | SspI          | SacI          | RHP           | XbaI          | SbfI         |
| +            | +             | +             | +             | +              | +             | +             | -             | -             | -            |
| -            | +             | +             | +             | +              | +             | +             | +             | +             | -            |
| -            | +             | +             | +             | +              | +             | +             | +             | -             | -            |
| -            | +             | +             | +             | +              | +             | +             | +             | -             | -            |
| -            | +             | +             | +             | +              | +             | -             | -             | -             | -            |
| -            | -             | +             | +             | +              | +             | +             | +             | -             | -            |
| -            | -             | +             | +             | +              | +             | +             | -             | +             | -            |
| -            | -             | +             | +             | +              | +             | -             | +             | -             | -            |
| -            | -             | +             | +             | +              | +             | -             | -             | -             | -            |
| -            | -             | -             | +             | +              | +             | +             | -             | -             | -            |
| -            | -             | -             | -             | +              | +             | +             | +             | +             | -            |
| -            | -             | -             | -             | +              | +             | +             | +             | +             | -            |
| -            | -             | -             | -             | +              | +             | +             | -             | +             | -            |
| -            | -             | -             | -             | +              | +             | -             | -             | -             | -            |
| -            | -             | -             | -             | +              | +             | -             | -             | -             | -            |
| -            | -             | -             | -             | +              | +             | -             | -             | -             | -            |
| -            | -             | -             | -             | +              | -             | +             | -             | -             | -            |
| -            | -             | -             | -             | +              | -             | -             | -             | -             | -            |
| <b>1</b>     | <b>5</b>      | <b>10</b>     | <b>11</b>     | <b>20</b>      | <b>17</b>     | <b>12</b>     | <b>9</b>      | <b>6</b>      | <b>0</b>     |
| <b>5.00%</b> | <b>25.00%</b> | <b>50.00%</b> | <b>55.00%</b> | <b>100.00%</b> | <b>85.00%</b> | <b>60.00%</b> | <b>45.00%</b> | <b>30.00%</b> | <b>0.00%</b> |
