# Supplementary material for: The Mechanism of Gene Targeting in Human Somatic Cells
Source: PLoS Genet. 2014 Apr 3;10(4):e1004251. doi: 10.1371/journal.pgen.1004251 (PMC3974634; doi:10.1371/journal.pgen.1004251)
Supplement: Table S10 — SNP retention of rAAV random integration colonies in MLH1+ HCT116 cells. (PDF) [file pgen.1004251.s014.pdf]

### S10. SNP retention of rAAV random integration colonies in *MLH1*<sup>+</sup> HCT116 cells.

[illegible]
